# Supplementary material for: Pathogen Eradication in Garlic in the Phytobiome Context: Should We Aim for Complete Cleaning?
Source: MDPI journal article supplement (doi:10.3390/plants12244125), 2023-12-10
Supplement: s1 [file s1]

Table S2. PCR detection of Potyviruses LYSV and OYDV, Allexiviruses and Carlaviruses in garlic tissues prior to *in vitro* culture, and following sanitation via shoot tip culture and cryotherapy. 32 garlic bulbs was separated into cloves and each genotype/clove served as an explant in different *in vitro* experiments. + detected; - not detected

| Sample number | LYSV                |           |             | OYDV                |           |             | Allexiviruses       |           |             | Carlaviruses        |           |             |
|---------------|---------------------|-----------|-------------|---------------------|-----------|-------------|---------------------|-----------|-------------|---------------------|-----------|-------------|
|               | Cloves no treatment | Shoot tip | Cryotherapy | Cloves no treatment | Shoot tip | Cryotherapy | Cloves no treatment | Shoot tip | Cryotherapy | Cloves no treatment | Shoot tip | Cryotherapy |
| 1             | +                   | +         | +           | -                   | -         | -           | +                   | -         | -           | -                   | -         | +           |
| 2             | +                   | +         | +           | -                   | -         | -           | +                   | +         | -           | -                   | -         | -           |
| 3             | +                   | -         | -           | -                   | -         | -           | +                   | -         | -           | -                   | -         | -           |
| 4             | +                   | -         | -           | -                   | +         | -           | +                   | -         | -           | -                   | -         | -           |
| 5             | +                   | +         | +           | -                   | -         | -           | +                   | +         | +           | -                   | -         | -           |
| 6             | +                   | +         | +           | +                   | +         | +           | -                   | +         | -           | -                   | +         | -           |
| 7             | +                   | +         | -           | -                   | +         | -           | -                   | +         | -           | -                   | +         | -           |
| 8             | +                   | +         | +           | +                   | +         | +           | +                   | -         | -           | +                   | +         | -           |
| 9             | -                   | -         | -           | +                   | +         | -           | -                   | -         | +           | +                   | +         | -           |
| 10            | +                   | +         | -           | +                   | +         | -           | +                   | +         | -           | -                   | -         | -           |
| 11            | +                   | +         | -           | -                   | +         | -           | +                   | -         | +           | -                   | -         | -           |
| 12            | +                   | +         | -           | +                   | +         | -           | +                   | +         | -           | +                   | -         | -           |
| 13            | +                   | -         | +           | +                   | +         | +           | +                   | +         | +           | +                   | -         | -           |
| 14            | +                   | +         | +           | -                   | -         | -           | +                   | +         | +           | -                   | -         | -           |
| 15            | +                   | +         | -           | +                   | +         | -           | +                   | +         | +           | +                   | +         | -           |
| 16            | +                   | +         | +           | +                   | +         | -           | -                   | -         | -           | -                   | -         | -           |
| 17            | +                   | +         | +           | -                   | -         | -           | -                   | -         | -           | +                   | -         | -           |
| 18            | +                   | +         | -           | +                   | -         | -           | +                   | +         | -           | -                   | -         | -           |
| 19            | +                   | +         | +           | -                   | -         | -           | -                   | -         | -           | -                   | -         | -           |
| 20            | +                   | +         | -           | +                   | +         | -           | +                   | +         | -           | +                   | -         | -           |
| 21            | +                   | +         | -           | -                   | -         | -           | -                   | +         | -           | -                   | -         | -           |
| 22            | +                   | +         | +           | -                   | -         | -           | +                   | +         | -           | -                   | -         | -           |
| 23            | +                   | +         | +           | +                   | -         | -           | +                   | +         | -           | +                   | +         | +           |
| 24            | +                   | +         | -           | +                   | -         | -           | +                   | +         | -           | +                   | +         | -           |
| 25            | -                   | +         | -           | +                   | -         | -           | +                   | -         | -           | -                   | -         | -           |
| 26            | +                   | +         | +           | +                   | -         | -           | +                   | +         | -           | +                   | +         | -           |
| 27            | +                   | +         | -           | +                   | -         | -           | -                   | +         | -           | +                   | +         | -           |
| 28            | +                   | -         | -           | +                   | -         | -           | +                   | +         | -           | -                   | +         | -           |
| 29            | -                   | +         | +           | +                   | -         | -           | +                   | +         | -           | -                   | -         | -           |
| 30            | +                   | +         | -           | -                   | -         | -           | +                   | +         | -           | -                   | -         | -           |
| 31            | +                   | +         | +           | +                   | +         | +           | -                   | +         | +           | -                   | -         | +           |
| 32            | +                   | +         | +           | +                   | +         | +           | -                   | -         | -           | +                   | +         | +           |
