# Supplementary material for: Pathogen Eradication in Garlic in the Phytobiome Context: Should We Aim for Complete Cleaning?
Source: MDPI journal article supplement (doi:10.3390/plants12244125), 2023-12-10
Supplement: s1 [file s1]

Table S1. Culturable bacteria isolated from garlic shoot tip after cryotherapy treatment

| <b>Isolate number</b> | <b>Cryotherapy</b>   | <b>Closest homolog</b>                                        | <b>Identity to closest homolog</b> | <b>Closest homolog locus tag</b> |
|-----------------------|----------------------|---------------------------------------------------------------|------------------------------------|----------------------------------|
| 111                   | Non-treated explants | <i>Bacillus subtilis</i> subsp. <i>subtilis</i> strain WXZS3  | 98%                                | OL468538.1                       |
| 112                   | Non-treated explants | <i>Bacillus subtilis</i> sp.                                  | 99%                                | MT111029.1                       |
| 113                   | Non-treated explants | <i>Bacillus subtilis</i> subsp. <i>subtilis</i> strain QSYS10 | 98%                                | OL468493.1                       |
| 120                   | Non-treated explants | <i>Bacillus subtilis</i> subsp. <i>subtilis</i> strain QSYS5  | 99%                                | OL468505.1                       |
| 114                   | Non-treated explants | <i>Pseudomonas lactis</i> strain Boxwood-SP                   | 91%                                | MK423985.1                       |
| 121                   | Treated explants     | <i>Bacillus subtilis</i> subsp. <i>subtilis</i> strain WXZP7  | 99%                                | OL468530.1                       |
| 116                   | Treated explants     | <i>Pseudomonas gessardii</i> strain OBE3                      | 99%                                | MN685265.1                       |
| 117                   | Treated explants     | <i>Pseudomonas gessardii</i> strain OBE3                      | 99%                                | MN685265.1                       |
| 118                   | Treated explants     | <i>Pseudomonas gessardii</i> strain OBE3                      | 98%                                | MN685265.1                       |
| 119                   | Treated explants     | <i>Pseudomonas gessardii</i> strain OBE3 16S                  | 98%                                | MN685265.1                       |
| 122                   | Treated explants     | <i>Pseudomonas gessardii</i> strain OBE3 16S                  | 98%                                | MN685265.1                       |
